# Supplementary material
Source: PubMed Central journal article supplement (PMC9841796)
Supplement: pt2c00120_si_001.pdf [file pt2c00120_si_001.pdf]

## **Neuroprotective effect of swertiamarin in a rotenone model of Parkinson's disease: Role of neuroinflammation and alpha-synuclein accumulation**

Monika Sharma<sup>1#</sup>, Fehmina Mushtaque Malim<sup>1#</sup>, Ashutosh Goswami<sup>2\$</sup>, Nishant Sharma<sup>1\$</sup>, Sai Sowmya Juvvalapalli<sup>2</sup>, Sayan Chatterjee<sup>1</sup>, Abhijeet S. Kate<sup>2@</sup>, Amit Khairnar<sup>1,3\*</sup>

### **Author Affiliations:**

<sup>1</sup>Department of Pharmacology and Toxicology, National Institute of Pharmaceutical Education and Research (NIPER), Ahmedabad, Gujarat, India

<sup>2</sup>Department of Natural Products, National Institute of Pharmaceutical Education and Research (NIPER), Ahmedabad, Gujarat, India

<sup>3</sup>International Clinical Research Center, St. Anne's University Hospital Brno, Brno, Czech Republic. ICRC, FNUSA Brno, Czech Republic

# Authors have contributed equally

\$ Authors have contributed equally

### **@Co-corresponding author:**

Abhijeet S. Kate, Ph.D

Associate Professor,

National Institute of Pharmaceutical Education and Research (NIPER), Ahmedabad, Palaj, Gandhinagar-382355, Gujarat, India.

Phone: +79 66745555

Email: kate.abhi.s@gmail.com/[abhijeetk@niperahm.ac.in](mailto:abhijeetk@niperahm.ac.in)

### **\* Corresponding author:**

Amit Khairnar, Ph.D

Assistant Professor,

National Institute of Pharmaceutical Education and Research (NIPER), Ahmedabad, Palaj, Gandhinagar-382355, Gujarat, India.

Phone: +91- 9284349396

Email: [amitkhairnar520@gmail.com](mailto:amitkhairnar520@gmail.com)

Present Address: International Clinical Research Center, St. Anne's University Hospital Brno, Brno, Czech Republic

ICRC, FNUSA Brno, Czech Republic

### **Co-authors:**

Monika Sharma ([monikasharma10dec@gmail.com](mailto:monikasharma10dec@gmail.com))

Fehmina Mushtaque Malim ([fehminamalim@yahoo.com](mailto:fehminamalim@yahoo.com))

Ashutosh Goswami ([ashutosh12101992@gmail.com](mailto:ashutosh12101992@gmail.com))

Nishant Sharma ([nishantsharma92@outlook.com](mailto:nishantsharma92@outlook.com))

Sai Sowmya Juvvalapalli ([saisowmyaj23@gmail.com](mailto:saisowmyaj23@gmail.com))

Sayan Chatterjee ([sayanchatt1996@gmail.com](mailto:sayanchatt1996@gmail.com))

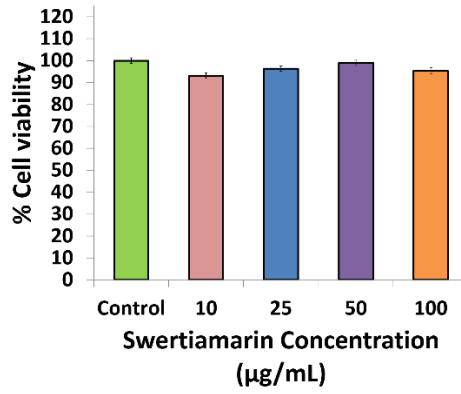

**Figure S1:** % cell viability of C6 glial cells after treatment with different concentrations of swertiamarin

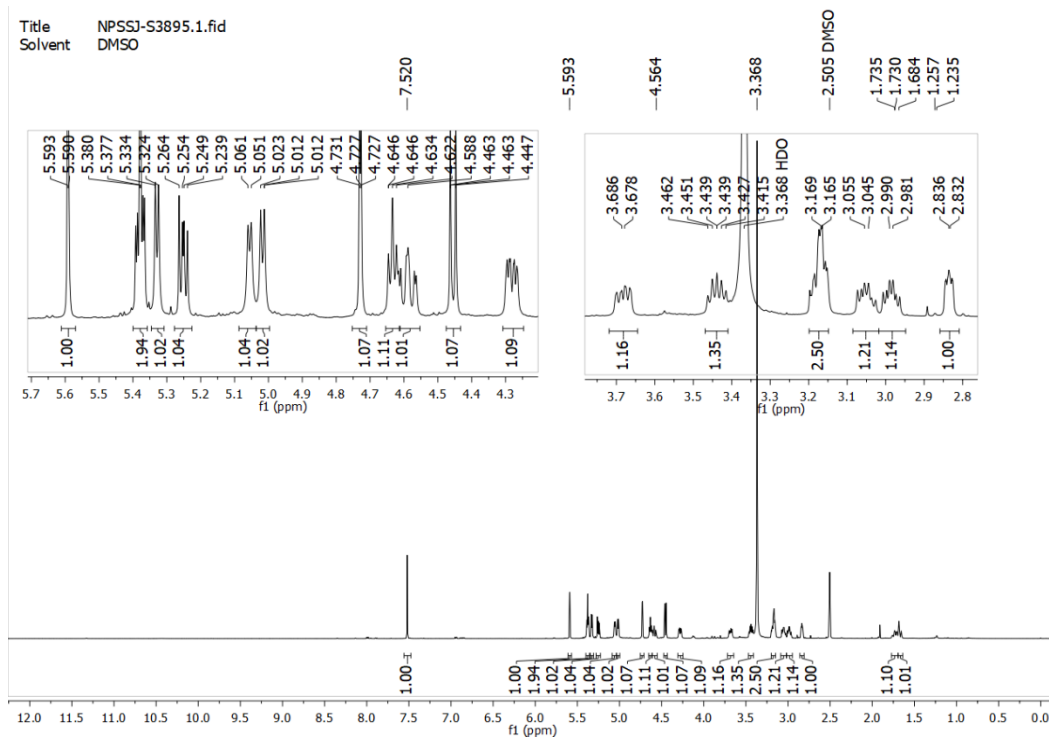

**Figure S2:**  $^1\text{H}$  NMR of swertiamarin in DMSO-d<sub>6</sub> at 500 MHz

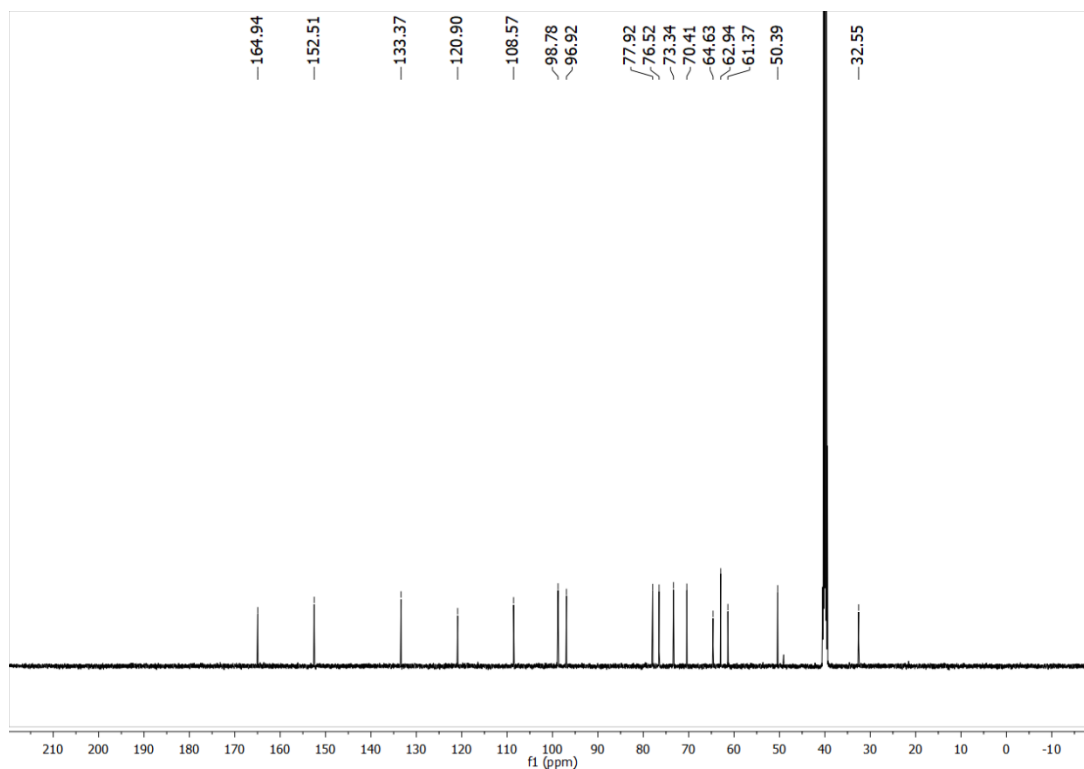

**Figure S3:**  $^{13}\text{C}$  NMR of swertiamarin in DMSO- $d_6$  at 125 MHz

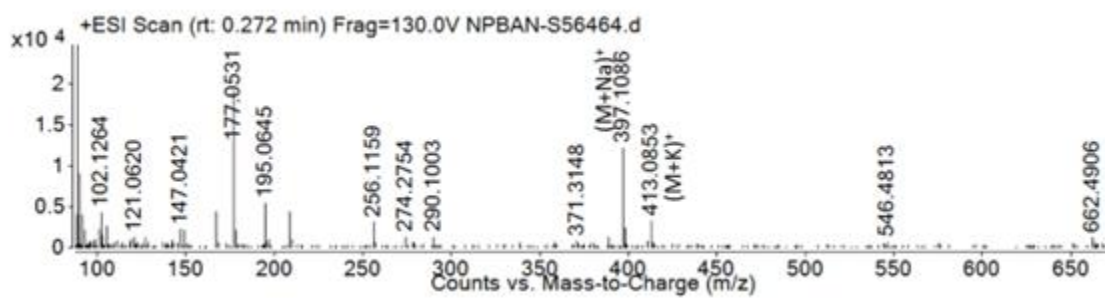

**Figure S4:** ESI-MS of isolated swertiamarin (HRMS (ESI)  $m/z$  Calcd for  $\text{C}_{16}\text{H}_{22}\text{O}_{10}\text{Na}$   $[\text{M}+\text{Na}]^+$  397.1105; Observed  $[\text{M}+\text{Na}]^+$  397.1086

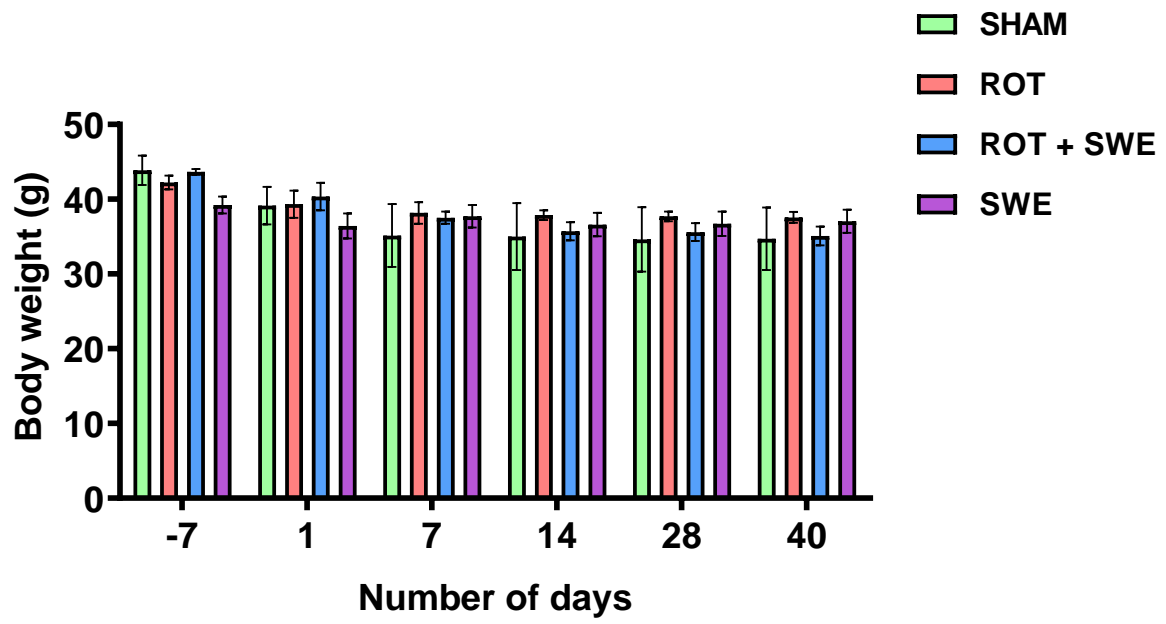

**Figure S5:** Body weights of mice of different groups at different time points
